# Supplementary material for: Experimental validation of immunogenic SARS-CoV-2 T cell epitopes identified by artificial intelligence
Source: Front Immunol. 2023 Nov 17;14:1265044. doi: 10.3389/fimmu.2023.1265044 (PMC10691274; doi:10.3389/fimmu.2023.1265044)
Supplement: Supplementary file 3 [file Table_2.xlsx]

## Sheet: Supplementary Table S2
Supplementary Table S2. Features of the NIP peptides validated in the screening.											NIP Predictions																	IEDB data curation
Peptide No.	Peptide Seq.	Region	Corresponding NSP	Peptide Length	Left_Flank	Right_Flank	Peptide stock dissolved in:	IFNG (ELISA)	Previously Reported (Y/Never)	Cross-reactivity to seasonal CoV	Prediction method	HLA-A*01:01	HLA-A*02:01	HLA-A*03:01	HLA-A*23:01	HLA-A*29:02	HLA-B*07:02	HLA-B*08:01	HLA-B*15:01	HLA-B*15:02	HLA-B*40:01	HLA-B*44:02	HLA-C*03:03	HLA-C*04:01	HLA-C*07:01	HLA-C*07:02	Top NIP MHC-I binding prediction (Summary)	Previously Reported (T cells activation assay)	MHC-I restrictions (by T cell assay)	Notes
3	APISAMVRM	Orf1ab	nsp3	9	VQM	YIF	40% DMSO	X	Y		AP/IP	7.9	13	8.5	8.5	3.2	0.04	1.9	4.5	0.46	3	3.3	0.43	1.9	2.7	1.9	HLA-B*07:02, HLA-B*15:02, HLA-C*03:03	Yes	HLA-C*07:02
4	TVAYFNMVY	Orf1ab	nsp5	9	SLA	MPA	70% DMSO		Y		IP/AP	0.22	14	0.65	5.3	0.02	5.1	12	0.18	0.09	13	4.8	2.3	3.8	1.5	1.4	HLA-A*01:01/HLA-C*03:03	Yes	HLA-A*01:01
6	TRFASVYAW	S		9	FNA	NRK	20% DMSO		Y		IP	7.4	12	8.2	0.75	1.7	4.9	4.9	3	2.5	1.9	0.74	2.7	2.8	0.07	0.12	HLA-C*07:01/02	Yes	HLA-C*07:02
9	AHFPREGVF	S		9	DGK	VSN	H2O	X	Y		AP	15	22	14	0.99	2.9	3.6	2.8	2.2	2.2	3.1	4.2	2.5	1.3	0.38	0.18	HLA-C*07:01/02	Yes	HLA-B*39:01	Positive/low
12	GLAAIMQLFF	Orf1ab	nsp3	10	YVL	SYF	H2O		Never		IP/AP	7.1	4	9.2	4	2.2	35	32	2.9	6.9	21	15	13	9.9	16	15	HLA-A*29:02	No	Unreported
13	REVRTIKVF	Orf1ab	nsp3	9	LSL	TTV	H2O	X	Never		IP	14	20	19	3.3	5.8	5.3	8.2	0.43	0.51	0.13	0.02	6.2	4.9	3.4	2.4	HLA-B*15:01/02, HLA-B*40:01, HLA-B*44:02	No	Unreported
14	RTIKGTHHW	Orf1ab	nsp5	9	AVK	LLL	H2O	X	Never		AP	2.6	8.5	3.3	0.6	0.98	4.1	9.2	0.43	0.59	5	0.78	1.2	2.5	1.1	1.3	HLA-A*23:01, HLA-A*29:02, HLA-B*15:01/02, HLA-B*44:02, HLA-C*07:01/02	No	Unreported
15	FHLDGEVITF	Orf1ab	nsp3	10	PTT	DNL	40% DMSO	X	Never		IP	1.1	0.75	15	0.39	2.2	7.2	6.2	2.6	1.7	3.1	6	1.7	0.27	0.72	0.48	HLA-A*01:01, HLA-A*02:01, HLA-A*23:01, HLA-C*04:01, HLA-C*07:01/02	No	Unreported
16	ILTALRLCAY	E		10	TLA	CCN	H2O		Never		IP	2.1	25	3.1	27	1.1	31	26	1.6	2.5	53	30	25	26	15	15	HLA-A*29:02	No	Unreported
18	MSYEDQDALF	Orf1ab	nsp12	10	YDS	AYT	20% DMSO	X	Never	NL63,229E	AP	0.47	17	12	0.29	1.2	12	15	0.8	0.74	11	8.2	1.6	0.25	2.6	2.3	HLA-A*01:01, HLA-A*23:01, HLA-A*29:02, HLA-B*15:01/02, HLA-C*04:01	No	Unreported
19	VQMAPISAM	Orf1ab	nsp3	9	INL	VRM	20% DMSO	X	Y		IP/AP	7.2	1.1	4.2	2.8	2.3	0.85	1.2	0.01	0.02	0.51	2	0.06	0.89	0.63	0.43	HLA-A*02:01, HLA-B*07:02, HLA-B*15:01/02, HLA-B*40:01, HLA-C*03:03, HLA-C*04:01, HLA-C*07:01/02	Yes	HLA-A*02:01
20	WLIINLVQM	Orf1ab	nsp3	9	WLM	API	33% DMSO		Never		IP/AP	11	0.82	18	7.1	4	9.8	3.6	3.7	2.7	8.9	27	1.1	3.4	5	2.8	HLA-A*02:01, HLA-C*03:03	No	Unreported
22	MGIIAMSAF	Orf1ab	nsp5	9	PFA	AMM	60% DMSO		Never		IP/AP	14	29	18	2.1	3	3.9	3.5	0.9	0.57	13	8.8	0.56	3.9	2.9	1.6	HLA-B*15:01/02, HLA-C*03:03	No	Unreported
24	ALYNKYKYF	Orf1ab	nsp4	9	RYL	SGA	H2O	X	Never	OC43, NL63, HKU1	IP/AP	5	2.2	1.5	0.38	0.65	6.6	0.25	0.12	0.4	5.3	2	1.6	0.61	0.43	0.17	HLA-A*23:01, HLA-A*29:02, HLA-B*08:01, HLA-B*15:01/02, HLA-C*04:01, HLA-C*07:01/02	No	Unreported
25	RARTVAGVSI	Orf1ab	nsp12	10	AKN	CST	H2O		Never	OC43, NL63, HKU1,229E	AP	28	24	15	14	24	0.66	4.9	5	7.3	7.7	18	2.3	9.3	1.7	3.2	HLA-B*07:02	No	Unreported
27	FLYLYALVYF	Orf3a		10	EAP	LQS	H2O	X	Never	NL63	AP	9.5	6.6	12	0.52	3.1	44	22	3.8	5.7	33	30	8.8	6.9	10	5.4	HLA-A*23:01	No	Unreported
28	SINFVRIIM	Orf3a		9	FLQ	RLW	28% DMSO	X	Never		IP/AP	5.1	5.9	5	8.8	3.1	0.93	2.9	2.6	1.6	13	19	1.2	3.7	2.7	2.7	HLA-B*07:02	No	Unreported
29	YEDQDALFAY	Orf1ab	nsp12	10	SMS	TKR	H2O		Y		IP/AP	0.3	13	9	8.8	0.42	5.3	16	2.1	0.65	0.74	0.17	7.6	1.7	2.5	2.5	HLA-A*01:01	No	Unreported	Negative or positive/low by MHC Ligand Assay for HLA-A*01:01, HLA-A*23:01, HLA-A*24:02, HLA-A*26:01, HLA-A*30:02, HLA-A*29:02
35	AIMQLFFSYF	Orf1ab	nsp3	10	GLA	AVH	H2O		Never		IP/AP	15	19	7.3	2.9	2.2	19	17	1.8	3.7	29	12	14	16	17	14	HLA-A*23:01, HLA-A*29:02, HLA-B*15:01	No	Unreported
37	VVRQCSGVTF	Orf1ab	nsp5	10	PFD	QSA	H2O	X	Never		AP	12	24	8.8	3.3	4.9	1.2	5	0.2	0.31	14	11	2.6	6.9	1.9	2.3	HLA-B*15:01/02	No	Unreported
39	TQYNRYLALY	Orf1ab	nsp4	10	LPL	NKY	H2O	X	Y		IP/AP	1.3	13	1.5	3.7	0.22	21	3.3	0.16	0.45	6.6	3.4	9.5	6.5	1.9	1.8	HLA-A*29:02, HLA-B*15:01/02,	No	Unreported	Positive or positive/low by MHC Ligand Assay for HLA-A*31:01, HLA-A*68:01, HLA-A*03:01, HLA-A*11:01, HLA-A*33:01
40	LLYDANYFL	Orf3a		9	KNP	CWH	60% DMSO		Y		AP	3.3	0.01	4.2	1.1	0.88	4.6	2	1.8	1.3	2.9	12	0.2	0.18	0.31	0.26	HLA-A*02:01, HLA-A*29:02, HLA-A*23:01, HLA-C*03:03, HLA-C*04:01, HLA-C*07:01/02	Yes	HLA-A*02:01
42	KHFYWFFSNY	Orf1ab	nsp4	10	IST	LKR	H2O		Never		IP/AP	11	45	5.9	3.1	0.96	41	56	6.7	11	24	13	28	19	4.7	3.7	HLA-A*29:02	No	Unreported
43	KFYGGWHNM	Orf1ab	nsp12	9	GTS	LKT	H2O	X	Never	OC43, NL63, HKU1,229E	AP	7.5	3	2.1	0.08	0.28	2.6	5.1	1.4	1.1	3.8	6.2	1.1	0.22	0.18	0.04	HLA-A*23:01, HLA-A*29:02, HLA-C*03:03, HLA-B*15:01/02, HLA-C*04:01, HLA-C*07:01/02	No	Unreported
44	MMFVKHKHA	Orf1ab	nsp5	9	AFA	FLC	H2O		Never		IP/AP	28	3.5	13	23	11	23	0.76	5.2	6	23	22	5.6	8.9	6.4	4.6	HLA-B*08:01	No	Unreported
45	LFFSYFAVHF	Orf1ab	nsp3	10	IMQ	ISN	H2O		Never		AP/IP	21	29	24	0.4	1.5	47	21	7.7	12	35	25	21	4.9	5.8	3.5	HLA-A*23:01	No	Unreported
46	GTHWFVTQR	S		9	VSN	NFY	H2O		Y		AP	8	22	0.32	21	3.4	25	35	19	21	14	17	23	11	6.8	9.8	HLA-A*03:01	Yes	HLA-A*31:01, HLA-A*68:01, HLA-A*11:01
47	IAMSAFAMM	Orf1ab	nsp5	9	MGI	FVK	67% DMSO		Never		IP/AP	6.9	6.8	11	2.1	2.1	1.4	1.6	1.2	0.39	8.1	13	0.03	1.5	1.6	0.94	HLA-B*15:02	No	Unreported
51	APISAMVRMY	Orf1ab	nsp3	10	VQM	IFF	H2O		Never		IP/AP	3	32	3.3	18	1.2	0.95	17	2.2	0.54	9.4	2.1	7.7	14	7.5	6.5	HLA-B*07:02, HLA-B*15:02	No	Unreported
52	MPASWVMRIM	Orf1ab	nsp6	10	MVY	TWL	60% DMSO	X	Y		IP/AP	16	36	35	23	15	0.34	7.9	16	4.3	23	23	4.3	9.5	14	11	HLA-B*07:02	No	Unreported	Positive by MHC Ligand Assay for HLA-B*07:02, HLA-B*35:01, HLA-B*51:01, HLA-B*54:01, HLA-B*53:01
57	FVSNGTHWFV	S		10	EGV	TQR	H2O		Y		AP	5.8	0.65	23	11	6.4	19	21	13	7	28	37	4.4	5.4	7.3	9.6	HLA-A*02:01	Yes	HLA-A*02:03, HLA-A*02:01
59	YMPASWVMRI	Orf1ab	nsp6	10	NMV	MTW	H2O	X	Never		IP/AP	15	1.1	19	2.6	6.7	2.1	14	15	18	24	23	4.5	2.4	5.6	3.7	HLA-A*02:01	No	Unreported
60	AMSAFAMMF	Orf1ab	nsp5	9	GII	VKH	40% DMSO		Never		IP/AP	2.7	2.1	2.3	0.28	0.29	7.8	6.3	0.23	0.6	4.3	3.1	1.7	0.73	2.3	1.1	HLA-A*23:01, HLA-A*29:02, HLA-B*15:01/02, HLA-C*04:01, HLA-C*07:02	No	Unreported
62	HFYWFFSNY	Orf1ab	nsp4	9	STK	LKR	50% DMSO	X	Never		IP/AP	2.7	20	2.5	0.93	0.09	9.4	18	3.2	3	12	7.7	6.5	2.1	0.78	0.44	HLA-A*23:01, HLA-A*29:02, HLA-C*07:01/02	No	Unreported
65	IIMRLWLCWK	Orf3a		10	FVR	CRS	H2O		Never		IP/AP	76	69	2.3	40	36	98	91	66	74	100	70	83	78	72	76	HLA-A*03:0	No	Unreported
67	NSFTRGVYY	S		9	AYT	PDK	H2O		Y		U	0.19	18	0.81	7.6	0.06	7.8	4.4	0.31	0.13	7.9	5	2.1	4.1	0.36	0.5	HLA-A*01:01/HLA-A*03:01/HLA-C*07:01/02	Yes	HLA-A*68:01, HLA-A*26:01, HLA-A*29:02
71	RLITGRLQSL	S		10	QID	QTY	H2O	X	Y	NL63,229E	U	25	0.74	6.5	7.6	11	2.3	0.74	1.5	5.4	6.2	15	2.8	4.4	3.6	3.4	HLA-A*02:01/HLA-B*08:01	Yes	HLA-A*02:01
73	IPTNFTISV	S		9	SIA	TTE	H2O		Y		U	15	8.5	14	8.8	9.9	0.11	2.2	22	3.9	7.9	16	0.6	2.1	2.5	2.7	HLA-B*07:02/HLA-C*03:03	Yes	HLA-B*07:02, HLA-B*51:01
74	RAAEIRASA	S		9	QLI	NLA	H2O		Y		U	14	6.3	7.6	27	11	0.59	1.7	2.2	2.2	7.5	13	0.66	5.4	3.6	5	HLA-B*07:02/HLA-C*03:03	Yes	HLA-B*07:02
76	IAIVMVTIM	S		9	AGL	LCC	85% DMSO	X	Never		U	17	15	26	6.3	6.4	3.4	3	2.8	1.7	11	23	0.17	4.7	3.4	2.5	HLA-C*03:03	No	Unreported
77	YLQPRTFLL	S		9	YVG	KYN	20% DMSO		Y		U	0.9	0.02	5.2	0.29	0.52	1.8	0.03	1.8	1.3	3.4	7.1	0.18	0.04	0.09	0.07	HLA-A*01:01/HLA-A*2:01/promiscuous	Yes	HLA-A*02:01, HLA-B*08:01
79	WTAGAAAYY	S		9	SSG	VGY	H2O		Y		U	0.03	14	1.4	7.7	0.02	7.6	21	0.24	0.15	11	5.1	1.9	3	0.86	1.2	HLA-A*01:01/HLA-C*07:01	Yes	HLA-A*26:01, HLA-A*29:02, HLA-A*01:01, HLA-B*35:01
80	LPIGINITRF	S		10	LVD	QTL	H2O		Y		U	9.3	22	19	3.6	3.5	0.31	4.4	4.7	0.88	7.9	6.5	2.1	4.2	7.5	5.2	HLA-B*07:02	Yes	HLA-B*07:02, HLA-B*35:01
82	YTNSFTRGVY	S		10	PPA	YPD	H2O	X	Y		U	0.09	29	3.3	21	0.28	11	28	0.69	0.79	27	8.6	6	11	2.7	3.4	HLA-A*01:01	Yes	HLA-A*01:01, HLA-A*26:01, HLA-C*16:02,
83	SPRRARSVA	S		9	QTN	SQS	H2O	X	Y		U	24	48	25	60	32	0.08	1.2	18	4.6	23	24	8.3	9.7	12	14	HLA-B*07:02	Yes	HLA-B*07:02
86	LPPAYTNSF	S		9	RTQ	TRG	H2O		Y		U	5.5	20	15	2.2	3.4	0.2	0.52	2.8	0.5	7.4	3.8	0.88	1.3	1.8	1.2	HLA-B*07:02/HLA-B*08:01/HLA-C*03:03	Yes	HLA-B*07:02, HLA-B*35:01, HLA-B*53:01
87	SIIAYTMSL	S		9	ASQ	GAE	50% DMSO	X	Y		U	9.3	0.11	3.8	2.3	1.5	0.61	0.25	1.2	0.68	4.9	8.5	0.06	0.85	0.46	0.21	HLA-A*2:01/promiscuous	Yes	HLA-A*02:01, HLA-B*08:01
88	ASFSTFKCY	S		9	YNS	GVS	H2O		Y		U	0.75	35	1.7	17	0.35	16	17	0.41	0.66	12	4.9	4.6	19	3.1	3.6	HLA-A*01:01	Yes	HLA class I	Tested but negative
89	EMIAQYTSAL	S		10	LTD	LAG	100% DMSO	X	Never		U	25	11	41	18	27	4.9	2.3	6.1	3.9	18	21	4.9	12	18	12	HLA-B*15:01/02	No	Unreported
91	YQPYRVVVL	S		9	GVG	SFE	H2O	X	Y		U	8.9	1.6	24	1.3	6.4	2.8	0.2	0.89	1.2	1.4	8.5	0.27	0.43	0.25	0.12	promiscuous	Yes	HLA-C*06:02
94	KVGGNYNYLY	S		10	LDS	RLF	H2O	X	Y		U	0.9	18	1.3	7.7	0.18	26	27	0.93	2.1	24	9.3	13	11	6	6.2	HLA-A*01:01	Yes	HLA-A*29:02
97	WTAGAAAYYV	S		10	SSG	GYL	H2O		Never		U	0.82	5.4	15	31	1.4	27	48	5.6	6.6	43	35	8.4	27	14	17	HLA-A*01:01	No	Unreported
98	FKNLREFVF	S		9	QGN	KNI	H2O	X	Y		U	11	24	36	3.8	4.8	13	2.2	3.7	3.3	5.8	8.7	4.2	2.8	0.88	0.74	HLA-C*07:01/02	Yes	HLA-C*07:01
99	GAAAYYVGY	S		9	WTA	LQP	60% DMSO		Y		U	0.69	15	1.8	8	0.09	8.4	14	0.22	0.21	7.1	3.8	2.6	5.9	1.8	1.7	HLA-A*01:01	Yes	HLA-A*29:02
100	MAYRFNGIG	S		9	AMQ	VTQ	100% DMSO		Never		U	53	52	43	35	34	18	29	19	14	53	70	8.1	50	27	32	high values for all HLAs	No	Unreported
101	TPINLVRDL	S		9	SKH	PQG	H2O	X	Y		U	30	25	31	14	17	0.08	1.2	19	3.4	7.2	7.4	1.6	5.2	5.4	4	HLA-B*07:02	Yes	HLA-B*07:02
102	FVFKNIDGYF	S		10	LRE	KIY	H2O		Never		U	3.3	6.6	14	1.1	0.99	13	12	1.3	1.5	13	20	2	1.6	3	2	HLA-A*23:01, HLA-A*29:02	No	Unreported
105	KTSVDCTMY	S		9	SMT	ICG	H2O	X	Y		U	0.28	32	2	20	0.4	21	33	0.92	2.2	23	11	13	18	5.7	7.2	HLA-A*01:01	No	Unreported	Only MHC Ligand Assay data for HLA-B*57:01 (Negative), and HLA-B*58:01 (Positive)
107	FVFKNIDGY	S		9	LRE	FKI	H2O	X	Y		U	0.34	5.2	1.5	4.3	0.03	8.9	12	0.12	0.08	7.1	5.6	0.8	2.8	0.6	0.48	HLA-A*01:01/HLA-C*03:03/HLA-C*07:01/02	Yes	HLA-A*26:01, HLA-A*29:02
